# Supplementary material for: Impact of incisor display and lower lip height on aesthetic perception and age estimation
Source: Research Square preprint supplement (doi:10.21203/rs.3.rs-6457217/v1), 2025-05-13
Supplement: Supplementary file 1 [file 05cd478e39b458f2a9755fc7.xlsx]

## Sheet: Planilha1
Table 2. Absolute and relative (%) frequency of age ranges attributed to each image by groups of examiners, with intragroup and intergroup statistical difference assessed by the Friedman and Kruskal-Wallis tests, respectively
	Orthodontists				Dentists				Laypersons				Intergroup difference p-value
	< 30	30-50	>50	Statitical intragroup difference	< 30	30-50	>50	Statitical intragroup difference	< 30	30-50	>50	Statitical intragroup difference
Reduced Lower Lip Height
100 Ui	49 (90.7%)	5 (9.3%)	0 (0%)	A	44 (81.5%)	10 (18.5%)	0 (0%)	AB	41 (75.9%)	13 (24.1%)	0 (0%)	A	0.121
80 Ui - 20 Li	43 (79.6%)	11 (20.4%)	0 (0%)	A	40 (74.1%)	14 (25.9%)	0 (0%)	AB	38 (70.4%)	15 (27.8%)	1 (1.9%)	AB	0.564
60 Ui - 40 Li	17 (31.5%)	32 (59.3%)	5 (9.3%)	B	35 (64.8%)	17 (31.5%)	2 (3.7%)	B	30 (55.6%)	23 (42.6%)	1 (1.9%)	B	0.006*
40 Ui - 60 Li	13 (24.1%)	17 (31.5%)	24 (44.4%)	C	29 (53.7%)	16 (29.6%)	9 (16.7%)	C	24 (44.4%)	22 (40.7%)	8 (14.8%)	DE	<0.001*
20 Ui - 80 Li	9 (16.7%)	11 (20.4%)	34 (63.0%)	D	25 (46.3%)	11 (20.4%)	18 (33.3%)	D	19 (35.2%)	22 (40.7%)	13 (24.1%)	E	<0.001*
Unaltered Lower Lips
100 Ui	50 (92.6%)	4 (7.4%)	0 (0%)	A	48 (88.9%)	6 (11.1%)	0 (0%)	A	41 (75.9%)	13 (24.1%)	0 (0%)	A	0.034*
80 Ui - 20 Li	40 (74.1%)	13 (24.1%)	1 (1.9%)	A	44 (81.5%)	10 (18.5%)	0 (0%)	A	37 (68.5%)	17 (31.5%)	0 (0%)	ABC	0.347
60 Ui - 40 Li	17 (31.5%)	31 (57.4%)	6 (11.1%)	B	35 (64.8%)	16 (29.6%)	3 (5.6%)	B	27 (50.0%)	24 (44.4%)	3 (5.6%)	BCD	0.014*
40 Ui - 60 Li	10 (18.5%)	16 (29.6%)	28 (51.9%)	CD	27 (50.0%)	15 (27.8%)	12 (22.2%)	CD	23 (42.6%)	22 (40.7%)	9 (16.7%)	DE	<0.001*
20 Ui - 80 Li	10 (18.5%)	6 (11.1%)	38 (70.4%)	D	23 (42.6%)	12 (22.2%)	19 (35.2%)	D	19 (35.2%)	23 (42.6%)	12 (22.2%)	E	<0.001*
A, B, C, D - Different letters mean statistically significant difference in the column
