# Supplementary material for: Impact of incisor display and lower lip height on aesthetic perception and age estimation
Source: Research Square preprint supplement (doi:10.21203/rs.3.rs-6457217/v1), 2025-05-13
Supplement: Supplementary file 2 [file 76be3b35ba8fa0d3a1f91c6f.xlsx]

## Sheet: Planilha1
Table 3. Linear regression R and R2 coefficients, and statistical significance for the influence of age, sex and group of evaluators on the values attributed to each image
	R	R2	F	p-value	Age p-value	Sex p-value	Laypersons x Dentists p-value	Laypersons x Orthodontists p-value
Reduced lower lip height
100 Ui	0.131	0.017	0.688	0.601	0.243	0.300	0.893	0.568
80 Ui - 20 Li	0.207	0.043	1752	0.141	0.282	0.910	0.856	0.043*
60 Ui - 40 Li	0.274	0.075	3185	0.015*	0.115	0.623	0.388	0.006*
40 Ui - 60 Li	0.338	0.114	5061	<0.001*	0.070	0.862	0.956	<0.001*
20 Ui - 80 Li	0.329	0.109	4778	0.001*	0.008*	0.965	0.282	0.002*
Unaltered lower lip
100 Ui	0.085	0.007	0.289	0.885	0.411	0.818	0.694	0.821
80 Ui - 20 Li	0.162	0.026	1061	0.378	0.338	0.708	0.348	0.081
60 Ui - 40 Li	0.289	0.083	3576	0.008*	0.381	0.297	0.479	0.002*
40 Ui - 60 Li	0.343	0.118	5234	<0.001*	0.015*	0.446	0.572	0.002*
20 Ui - 80 Li	0.341	0.116	5155	<0.001*	0.035*	0.130	0.478	0.003*
