# Supplementary material for: Impact of incisor display and lower lip height on aesthetic perception and age estimation
Source: Research Square preprint supplement (doi:10.21203/rs.3.rs-6457217/v1), 2025-05-13
Supplement: Supplementary file 3 [file 9e3bbbb9aad728f1e8ff4dfa.xlsx]

## Sheet: Planilha1
Table 1. Mean (SD) of values attributed to the each image by groups of examiners, with intragroup statistical differences, assessed by repeated measures ANOVA with Tukey’s post hoc test.
	Orthodontists			Dentists			Laypersons
	Reduced LLH	Unalterd LL	p-value	Reduced LLH	Unalterd LL	p-value	Reduced LLH	Unalterd LL	p-value
100 Ui	6.23 (2.12) A	7.43 (1.82) A	<.001	6.56 (2.41) AB	7.68 (1.82) A	<.001	6.48 (2.64) AB	7.53 (2.18) A	<.001
80 Ui - 20 Li	6.63 (2.41) A	7.06 (2.34) A	0.086	7.45 (1.94) A	7.41 (1.98) A	0.874	7.52 (2.01) A	7.78 (1.86) A	0.269
60 Ui - 40 Li	4.45 (2.06) B	4.15 (1.83) B	0.109	5.39 (2.14) B	5.24 (2.22) B	0.593	5.77 (2.58) B	5.55 (2.49) B	0.379
40 Ui - 60 Li	2.14 (1.76) C	2.34 (1.65) C	0.323	3.52 (2.03) C	3.39 (1.83) C	0.455	3.54 (2.31) C	3.60 (2.23) C	0.790
20 Ui - 80 Li	1.24 (1.41) D	1.24 (1.18) D	0.964	2.05 (1.82) D	2.17 (1.93) D	0.491	2.42 (2.24) D	2.43 (2.25) D	0.955
SD - standard deviation; LLH - lower lip height; LL - lower lip; A, B, C, D - different letters mean statistical significant difference in the column
